# Supplementary material
Source: publisher figshare collection journal article supplement (https://tandf.figshare.com/articles/dataset/_/14463739)
Supplement: Supplementary file 1 [file 2]

Supplementary material

Appendix 4

**Table 5.** Challenges identified in the presence of the COVID-19 pandemic

| - Priorization of patients who need lung function testing. - Limit and priorization of the request for lung function testing. - To establish safe protocols for patients and health care professionals. - Limit examinations at the hospital and encourage those that can be performed by the patient at home. - Training of patients in those cases where function tests are carried out at home. - Assume the leadership role in monitoring COVID-19 (in certain units and cases). - To determine the degree of leadership to be assumed in non-critical patients. - To increase the volume of assistance with less effective time for face-to-face consultation. - To perform a follow-up of patients of quality beyond follow-up by phone. - Role of video calling versus telephone contact. - Incorporation of telemedicine in the usual dynamics of consultations. - To better define the profile of patients to adapt the care to be provided. - To ensure the empowerment of the nursing role. - Definition of easy and fast criteria between primary care and specialized care. - Management of the change of paradigm and mentality in the units because all lung function tests could not have been used as before. - Empower the patient of his/her disease through technologies and new established circuits. - Educate the patient in the new management of virtual consultations. - To learn how to manage Learn the new working model and to maintain it over time. - Definition of safety protocols for health care professionals. - Reduction of face-to-face visits and potentiation of telemedicine. - Definition of protocols to maintain a safe distance between patients in the waiting rooms. - Definition of protocols for alternating face-to-face and virtual visits. - Empower nursing for the follow-up and education of patients. - Development of initiatives to individualize the type of care to be provided and to improve patient’s knowledge of the disease and treatment. |
| --- |
